# Supplementary material for: DNA fusion-gene vaccination in patients with prostate cancer induces high-frequency CD8+ T-cell responses and increases PSA doubling time
Source: Springer Nature journal article supplement (doi:10.1007/s00262-012-1270-0), 2012-05-21
Supplement: MOESM1 [file 8232036]

**Online Resource 1: MIATA reporting of T-cell assays**

|                                                                                                                                                                                                                                                                                                                                                                                                                                                                                                                                                                                                                                                                                                                                                                                                                                                                                                                                                                                                                                                                                                                                                                                                                                                                                                                                                                                                                                                                                                                                                                                                                                                                                                                                                                                                                                                                                                                                                                                                                                                                                                                                                                                                                                                                                                                                                                                                                                                                                                                                                                                                                                                                                                                                                                                                                                                                                                                                                        |
|--------------------------------------------------------------------------------------------------------------------------------------------------------------------------------------------------------------------------------------------------------------------------------------------------------------------------------------------------------------------------------------------------------------------------------------------------------------------------------------------------------------------------------------------------------------------------------------------------------------------------------------------------------------------------------------------------------------------------------------------------------------------------------------------------------------------------------------------------------------------------------------------------------------------------------------------------------------------------------------------------------------------------------------------------------------------------------------------------------------------------------------------------------------------------------------------------------------------------------------------------------------------------------------------------------------------------------------------------------------------------------------------------------------------------------------------------------------------------------------------------------------------------------------------------------------------------------------------------------------------------------------------------------------------------------------------------------------------------------------------------------------------------------------------------------------------------------------------------------------------------------------------------------------------------------------------------------------------------------------------------------------------------------------------------------------------------------------------------------------------------------------------------------------------------------------------------------------------------------------------------------------------------------------------------------------------------------------------------------------------------------------------------------------------------------------------------------------------------------------------------------------------------------------------------------------------------------------------------------------------------------------------------------------------------------------------------------------------------------------------------------------------------------------------------------------------------------------------------------------------------------------------------------------------------------------------------------|
| <b>MODULE 1: INFORMATION ON THE SAMPLE</b>                                                                                                                                                                                                                                                                                                                                                                                                                                                                                                                                                                                                                                                                                                                                                                                                                                                                                                                                                                                                                                                                                                                                                                                                                                                                                                                                                                                                                                                                                                                                                                                                                                                                                                                                                                                                                                                                                                                                                                                                                                                                                                                                                                                                                                                                                                                                                                                                                                                                                                                                                                                                                                                                                                                                                                                                                                                                                                             |
| <b>IA: DONOR</b>                                                                                                                                                                                                                                                                                                                                                                                                                                                                                                                                                                                                                                                                                                                                                                                                                                                                                                                                                                                                                                                                                                                                                                                                                                                                                                                                                                                                                                                                                                                                                                                                                                                                                                                                                                                                                                                                                                                                                                                                                                                                                                                                                                                                                                                                                                                                                                                                                                                                                                                                                                                                                                                                                                                                                                                                                                                                                                                                       |
| Patient demographics can be found in Table 1.                                                                                                                                                                                                                                                                                                                                                                                                                                                                                                                                                                                                                                                                                                                                                                                                                                                                                                                                                                                                                                                                                                                                                                                                                                                                                                                                                                                                                                                                                                                                                                                                                                                                                                                                                                                                                                                                                                                                                                                                                                                                                                                                                                                                                                                                                                                                                                                                                                                                                                                                                                                                                                                                                                                                                                                                                                                                                                          |
| <b>IB: SOURCE</b>                                                                                                                                                                                                                                                                                                                                                                                                                                                                                                                                                                                                                                                                                                                                                                                                                                                                                                                                                                                                                                                                                                                                                                                                                                                                                                                                                                                                                                                                                                                                                                                                                                                                                                                                                                                                                                                                                                                                                                                                                                                                                                                                                                                                                                                                                                                                                                                                                                                                                                                                                                                                                                                                                                                                                                                                                                                                                                                                      |
| Blood was collected in Lithium/Heparin blood tubes at each study visit for each of the vaccinated patients. The time between drawing and processing was <4hrs. Samples taken at Royal Marsden Hospital were couriered as soon as possible after drawing and transferred at room temperature to Southampton for processing.<br><br>PBMC were purified by density gradient centrifugation using Lymphoprep (Axis Shield). PBMC were counted and viability checked prior to freezing using manual cytometer and Trypan Blue.                                                                                                                                                                                                                                                                                                                                                                                                                                                                                                                                                                                                                                                                                                                                                                                                                                                                                                                                                                                                                                                                                                                                                                                                                                                                                                                                                                                                                                                                                                                                                                                                                                                                                                                                                                                                                                                                                                                                                                                                                                                                                                                                                                                                                                                                                                                                                                                                                              |
| <b>IC: CRYOPORESERVATION AND STORAGE</b>                                                                                                                                                                                                                                                                                                                                                                                                                                                                                                                                                                                                                                                                                                                                                                                                                                                                                                                                                                                                                                                                                                                                                                                                                                                                                                                                                                                                                                                                                                                                                                                                                                                                                                                                                                                                                                                                                                                                                                                                                                                                                                                                                                                                                                                                                                                                                                                                                                                                                                                                                                                                                                                                                                                                                                                                                                                                                                               |
| All assays were carried out on cryopreserved PBMC. PBMC were frozen at a concentration of 5-10 x10 <sup>6</sup> per vial in 50% human AB serum (Sigma batch tested) 40% RPMI 1640 (+ sodium pyruvate and PSG) and 10% DMSO. Freezing additives were added at room temperature before aliquotting cells into cryovials. The vials were then transferred to a Nalgene Mr Frosty and kept at -80°C overnight. Vials were then stored in Liquid Nitrogen until the full time course had been collected.<br><br>PBMC were stored in Liquid Nitrogen for a range of 20-38 months before thawing and testing (based on baseline samples, which were stored for the longest period for each donor).                                                                                                                                                                                                                                                                                                                                                                                                                                                                                                                                                                                                                                                                                                                                                                                                                                                                                                                                                                                                                                                                                                                                                                                                                                                                                                                                                                                                                                                                                                                                                                                                                                                                                                                                                                                                                                                                                                                                                                                                                                                                                                                                                                                                                                                            |
| <b>ID: QUALITY OF CELL MATERIAL</b>                                                                                                                                                                                                                                                                                                                                                                                                                                                                                                                                                                                                                                                                                                                                                                                                                                                                                                                                                                                                                                                                                                                                                                                                                                                                                                                                                                                                                                                                                                                                                                                                                                                                                                                                                                                                                                                                                                                                                                                                                                                                                                                                                                                                                                                                                                                                                                                                                                                                                                                                                                                                                                                                                                                                                                                                                                                                                                                    |
| Mean viability after thawing was 94% (range 70-100). Mean recovery of PBMC after thawing was 89% (range 41-123%), as determined by a % percentage of cell input number before freezing and counting by manual haemocytometer and Trypan Blue post thawing respectively.                                                                                                                                                                                                                                                                                                                                                                                                                                                                                                                                                                                                                                                                                                                                                                                                                                                                                                                                                                                                                                                                                                                                                                                                                                                                                                                                                                                                                                                                                                                                                                                                                                                                                                                                                                                                                                                                                                                                                                                                                                                                                                                                                                                                                                                                                                                                                                                                                                                                                                                                                                                                                                                                                |
| <b>MODULE 2: INFORMATION ON THE ASSAY</b>                                                                                                                                                                                                                                                                                                                                                                                                                                                                                                                                                                                                                                                                                                                                                                                                                                                                                                                                                                                                                                                                                                                                                                                                                                                                                                                                                                                                                                                                                                                                                                                                                                                                                                                                                                                                                                                                                                                                                                                                                                                                                                                                                                                                                                                                                                                                                                                                                                                                                                                                                                                                                                                                                                                                                                                                                                                                                                              |
| <b>2A: CELL COUNTING</b>                                                                                                                                                                                                                                                                                                                                                                                                                                                                                                                                                                                                                                                                                                                                                                                                                                                                                                                                                                                                                                                                                                                                                                                                                                                                                                                                                                                                                                                                                                                                                                                                                                                                                                                                                                                                                                                                                                                                                                                                                                                                                                                                                                                                                                                                                                                                                                                                                                                                                                                                                                                                                                                                                                                                                                                                                                                                                                                               |
| Mean viability after thawing was 94% (range 70-100). Mean recovery of PBMC after thawing was 89% (range 41-123%), expressed as a percentage of cell input number before freezing and counting by manual haemocytometer and Trypan Blue.                                                                                                                                                                                                                                                                                                                                                                                                                                                                                                                                                                                                                                                                                                                                                                                                                                                                                                                                                                                                                                                                                                                                                                                                                                                                                                                                                                                                                                                                                                                                                                                                                                                                                                                                                                                                                                                                                                                                                                                                                                                                                                                                                                                                                                                                                                                                                                                                                                                                                                                                                                                                                                                                                                                |
| <b>2B: MEDIUM/SERUM</b>                                                                                                                                                                                                                                                                                                                                                                                                                                                                                                                                                                                                                                                                                                                                                                                                                                                                                                                                                                                                                                                                                                                                                                                                                                                                                                                                                                                                                                                                                                                                                                                                                                                                                                                                                                                                                                                                                                                                                                                                                                                                                                                                                                                                                                                                                                                                                                                                                                                                                                                                                                                                                                                                                                                                                                                                                                                                                                                                |
| Ex vivo CD8 and CD4 ELISPOT assay:<br>RPMI 1640 + sodium pyruvate + PSG+ 10% Human AB Serum (Sigma batch tested)<br><br>Cultured ELISPOT assay:<br>Xvivo 15 + 5% human AB serum (Lonza 14-498E)                                                                                                                                                                                                                                                                                                                                                                                                                                                                                                                                                                                                                                                                                                                                                                                                                                                                                                                                                                                                                                                                                                                                                                                                                                                                                                                                                                                                                                                                                                                                                                                                                                                                                                                                                                                                                                                                                                                                                                                                                                                                                                                                                                                                                                                                                                                                                                                                                                                                                                                                                                                                                                                                                                                                                        |
| <b>2C: THE ASSAY</b>                                                                                                                                                                                                                                                                                                                                                                                                                                                                                                                                                                                                                                                                                                                                                                                                                                                                                                                                                                                                                                                                                                                                                                                                                                                                                                                                                                                                                                                                                                                                                                                                                                                                                                                                                                                                                                                                                                                                                                                                                                                                                                                                                                                                                                                                                                                                                                                                                                                                                                                                                                                                                                                                                                                                                                                                                                                                                                                                   |
| Ex vivo CD8 and CD4 ELISPOT:<br>Clear Multiscreen 96-well ELISPOT plates (Millipore, MAIPS4510) were pre-coated with 15 µg/ml anti-human IFN $\gamma$ antibody (mAb 1 D1 K, Mabtech), and left overnight at 4°C. Thawed PBMCs (4 x10 <sup>5</sup> /well) were incubated in triplicate for 20 h (CD8+) or 40 h (CD4+), at 37°C, 5% CO <sub>2</sub> with medium only, test antigen (CD8+: 10 µg/ml peptide (PSMA27, 27–35, (VLAGGFFLL) a pool of viral peptides comprising equal amounts of cytomegalovirus (CMV), CMV pp65 493–499, (NLVPMVAVT); influenza A, Matrix 1 58–66, (GILCFVFTL); Epstein Barr virus (EBV), BMLFI 259–217 (GLCTLVAML), and measles, non-structural C protein 84–92 (KLWESPQEI) [16]. An HIV peptide, IV9 RT 476–484 (ILKEPVHGV) [17] served as negative control). HLA A0201-binding peptides were obtained, with certificates of 95% purity, from Peptide Protein Research Ltd (Fareham, UK). (CD4+: 20 µg/ml recombinant FrC protein. Recombinant c kappa-tagged protein was generated in house, using a mammalian 293-F expression system (Freestyle, Invitrogen), and purified on a column of polyclonal sheep anti-human free kappa linked to Sepharose 4B beads. Protein quality was confirmed on SDS gels and anti-kappa blots and endotoxin levels were tested before use in ELISPOT. In both assays 5 µg/ml Phytohemagglutinin (PHA) was used to confirm that cells were able to produce detectable IFN $\gamma$ . IFN $\gamma$ secreting memory T-cells specific for the antigen were detected as spots using 1 µg/ml biotinylated IFN $\gamma$ antibody (mAb 7B61 biotin, Mabtech) followed by 1 µg/ml streptavidin alkaline phosphatase (Mabtech) and a BCIP/ NBT detection kit (Zymed).<br><br>Cultured ELISPOT:<br>Cells were cultured in 2mL Xvivo 15 media (Invitrogen) + 5% human AB serum (Lonza, batch tested) at a concentration of 2 x10 <sup>6</sup> per well (COSTAR, 12 well culture plate) with 10µg/mL of peptide. Cells were either cultured with PSMA27, (VLAGGFFLL) or, as a positive control, a pool of viral peptides (as above). HIV peptide (ILKEPVHGV) served as negative control. The plates were incubated at 37°C 5% CO <sub>2</sub> . On days 3 and 6, 1mL of media was removed from each well and replaced with 1mL 20IU/ml IL-2 (R&D systems). On day 8 the cells were harvested, washed 3 times and rested overnight in CRPMI +10% AB serum at 37C, 5% CO <sub>2</sub> . The following day the cells were counted and added to ELISPOT plates previously coated with anti-IFN $\gamma$ antibody at a concentration of 50,000 cells per well (or 5,000 cells per well for cells stimulated in culture with viral antigens). The cells were stimulated in the plate overnight with 10µg/mL of peptide matched to the peptide they were stimulated with in culture, HIV peptide or with CRPMI +10% AB serum with no peptide. Spots were developed using method above for ex vivo ELISPOT. |

|                                                                                                                                                                                                                                                                                                                                                                                                                                                                                                |                    |              |                 |              |                   |              |
|------------------------------------------------------------------------------------------------------------------------------------------------------------------------------------------------------------------------------------------------------------------------------------------------------------------------------------------------------------------------------------------------------------------------------------------------------------------------------------------------|--------------------|--------------|-----------------|--------------|-------------------|--------------|
| <b>2D: CONTROLS</b>                                                                                                                                                                                                                                                                                                                                                                                                                                                                            |                    |              |                 |              |                   |              |
| <p>Ex vivo CD8 and CD4 ELISPOT assay:<br/> A negative control of media only and HIV peptide (CD8 only) and positive control of PHA were used.</p> <p>Cultured ELISPOT assay:<br/> A pool of viral peptides was used as a positive control for the in vitro culture. In the ELISPOT, cells were tested against media only and HIV peptide as a negative control.</p>                                                                                                                            |                    |              |                 |              |                   |              |
| <b>MODULE 3: DATA ACQUISITION</b>                                                                                                                                                                                                                                                                                                                                                                                                                                                              |                    |              |                 |              |                   |              |
| <b>3A: EQUIPMENT AND SOFTWARE</b>                                                                                                                                                                                                                                                                                                                                                                                                                                                              |                    |              |                 |              |                   |              |
| ELISPOT plates were read on an AID ELISPOT plate reader (Autoimmun diagnostika GmbH) using software ELR04.                                                                                                                                                                                                                                                                                                                                                                                     |                    |              |                 |              |                   |              |
| <b>3B: ACQUISITION STRATEGY</b>                                                                                                                                                                                                                                                                                                                                                                                                                                                                |                    |              |                 |              |                   |              |
| 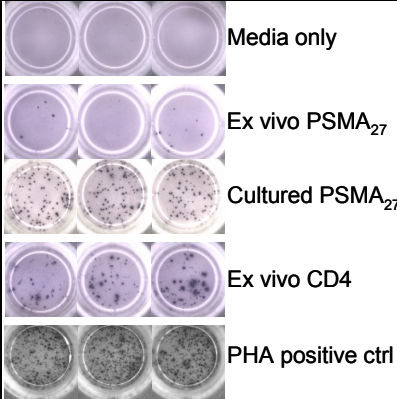 <p>Media only</p> <p>Ex vivo PSMA<sub>27</sub></p> <p>Cultured PSMA<sub>27</sub></p> <p>Ex vivo CD4</p> <p>PHA positive ctrl</p>                                                                                                                                                                                                                                                                             |                    |              |                 |              |                   |              |
| Example of raw data: representative wells taken from Ex vivo CD8, Ex vivo CD4 and cultured ELISPOT assays                                                                                                                                                                                                                                                                                                                                                                                      |                    |              |                 |              |                   |              |
| <b>MODULE 4: THE INTERPREATION OF RESULTS</b>                                                                                                                                                                                                                                                                                                                                                                                                                                                  |                    |              |                 |              |                   |              |
| <b>4A: RAW DATA</b>                                                                                                                                                                                                                                                                                                                                                                                                                                                                            |                    |              |                 |              |                   |              |
| <p>Plates were read and data calculated as follows:</p> <p>The spots per well were recalculated to spots per million PBMC.<br/> The mean of media control triplicate subtracted from antigen specific samples.<br/> Mean and SD were then calculated for each triplicate for antigen specific responses.</p> <p>Below is a table of median (and range) spots per million PBMC from every patient and time point measured following stimulation with media only or antigen (PSMA27 or FrC).</p> |                    |              |                 |              |                   |              |
|                                                                                                                                                                                                                                                                                                                                                                                                                                                                                                | <b>All samples</b> |              | <b>Baseline</b> |              | <b>Weeks 2-72</b> |              |
|                                                                                                                                                                                                                                                                                                                                                                                                                                                                                                | <b>Median</b>      | <b>Range</b> | <b>Median</b>   | <b>Range</b> | <b>Median</b>     | <b>Range</b> |
| <b>CD8 ELISPOT</b>                                                                                                                                                                                                                                                                                                                                                                                                                                                                             |                    |              |                 |              |                   |              |
| Ex vivo background (media only)                                                                                                                                                                                                                                                                                                                                                                                                                                                                | 8                  | 0-242        | 10              | 0-234        | 8                 | 0-242        |
| Antigen-specific response (PSMA27)                                                                                                                                                                                                                                                                                                                                                                                                                                                             | 3                  | 0-201        | 2               | 0-29         | 3                 | 0-201        |
| <b>CD4 ELISPOT</b>                                                                                                                                                                                                                                                                                                                                                                                                                                                                             |                    |              |                 |              |                   |              |
| Ex vivo background (media only)                                                                                                                                                                                                                                                                                                                                                                                                                                                                | 8                  | 0-220        | 15              | 0-87         | 8                 | 0-220        |
| Antigen-specific response (FrC)                                                                                                                                                                                                                                                                                                                                                                                                                                                                | 60                 | 0-396        | 39              | 0-153        | 63                | 0-396        |
| <b>CULTURED ELISPOT</b>                                                                                                                                                                                                                                                                                                                                                                                                                                                                        |                    |              |                 |              |                   |              |
| Cultured background (media only)                                                                                                                                                                                                                                                                                                                                                                                                                                                               | 188                | 0-3075       | 207             | 0-1147       | 187               | 0-3075       |
| Antigen-specific response (PSMA27)                                                                                                                                                                                                                                                                                                                                                                                                                                                             | 148                | 0-8233       | 27              | 0-2373       | 266               | 0-8233       |
| Raw data may be provided upon request.                                                                                                                                                                                                                                                                                                                                                                                                                                                         |                    |              |                 |              |                   |              |
| <b>4B: RESPONSE DETERMINATION, STATISTICAL TESTS AND EMPIRICAL RULES</b>                                                                                                                                                                                                                                                                                                                                                                                                                       |                    |              |                 |              |                   |              |
| <p>A positive response in the ELISPOT was determined by:</p> <p>a) more than 25 spots per million PBMC<br/> b) the antigen specific response must be 2xSD above the media control</p>                                                                                                                                                                                                                                                                                                          |                    |              |                 |              |                   |              |

c) for a response between time points, the time point must be 2xSD above the baseline antigen specific response, 2 fold increase above baseline and significant when tested by Student T Test.

A negative response - is a patient with no time points that meet the above criteria.

A weak positive (+) is a patient whose response is significant by T test but is less than two fold above baseline.

A positive responder + has one time point that meets the above criteria

A strong positive responder ++, has more than one time point that meets the above criteria

Definition criteria were pre-defined before the study commenced.

Data exclusion applied on a maximum of three wells per plate; For example, an outlier could be removed from a triplicate.

## **MODULE 5: THE LABORATORY ENVIRONMENT**

### **5A: GENERAL LABORATORY OPERATION**

These studies were conducted in a laboratory that operates to GCLP.

### **5B: LABORATORY PROCEDURE STANDARDIZATION**

These studies were performed using standard operating protocols covering all aspects from processing of cells, the assay, the data acquisition and data interpretation.

### **5C: STATUS OF ASSAY QUALIFICATION AND VALIDATION**

These studies were performed using validated assays.

**Online Resource 2: Adverse Events believed to be likely or possibly related to vaccination**

| <b>Adverse Event</b>                                                             | <b>Grade 1<br/>No. (%)</b> | <b>Grade 2/3<br/>No. (%)</b> |
|----------------------------------------------------------------------------------|----------------------------|------------------------------|
| <b>Injection site reaction:</b><br>Haematoma, Pain, Bruising, Oedema, Induration | 5 (16)                     | 2 (6)                        |
| <b>Constitutional symptoms:</b><br>Flu-like syndrome                             | 2 (6)                      |                              |
| <b>Musculoskeletal</b><br>Back pain                                              |                            | 1 (3)                        |
| <b>Other</b><br>Psoriasis*<br>Nail changes<br>TURP<br>Parkinson's disease*†      | 1 (3)                      | 1 (3)<br>1 (3)<br>1 (3)      |

Data represent the number of patients (out of 32) that reported an event at any time during the 72 week follow-up period, with the highest grade being recorded if more than one event was reported for one patient. \*These patients discontinued vaccination and were replaced on study. †Deemed unlikely to be caused by the vaccine.

### Online Resource 3: PSA Doubling Times

| PATIENT       | PSA Doubling Time in Months<br>(No. Months, No. PSA Values Used for Calculation) |                      |                     |                    |                       |
|---------------|----------------------------------------------------------------------------------|----------------------|---------------------|--------------------|-----------------------|
|               | Pre-treatment                                                                    | Weeks<br>0-24        | Weeks<br>24-48      | Weeks<br>48-72     | Weeks<br>0-72         |
| 1             | 13·6 (27,8)                                                                      | 11·9 (6,10)          | <b>35·3</b> (6,6)   | <b>227·4</b> (7,4) | 13·7 (18,21)          |
| 2             | 5·7 (10,7)                                                                       | 9·0 (6,10)           | <b>12·6</b> (6,6)   | 3·1 (1, 2 *)       | 8·7 (13,18*)          |
| 3             | 7·7 (38,9)                                                                       | 6·2 (6,10)           | <b>16·6</b> (6,6)   | 9·5 (6,4)          | 10·8 (18,20)          |
| 4             | 31·7 (55,12)                                                                     | <b>115·7</b> (6,10)  | 42·0 (6,6)          | 17·5 (6,4)         | 48·3 (18,20)          |
| 5             | -51·8 (9,8)                                                                      | 9·6 (6,10)           | 54 (6,8)            | 20·8 (5,6)         | 18·0 (17,24)          |
| 6             | 8·7 (7,5)                                                                        | 9·1 (6,10)           | 6·9 (6,6)           | 3·8 (5,4)          | 7·1 (17,20)           |
| 7             | 67·9 (18,6)                                                                      | 65·2 (6,9)           | <b>-117·4</b> (6,7) | 32·5 (5,7)         | 58·7 (17,23)          |
| 8             | 16·5 (47,12)                                                                     | 20·7 (6,9)           | 16·4 (6,6)          | <b>39·8</b> (6,6)  | 25·5 (18,21)          |
| 9             | 11·8 (53,17)                                                                     | 17·0 (6,10)          | 14·7 (6,6)          | 5·1 (6,3)          | 9·2 (18,19)           |
| 10            | 30·4 (36,7)                                                                      | 24·5 (6,10)          | 14·9 (6,6)          | 24·0 (6,5)         | <b>62·6</b> (18,21)   |
| 11            | 15·2 (23,7)                                                                      | 9·0 (5,10)           | 27·5 (5,8)          | 9·9 (6,7)          | 17·3 (16,25)          |
| 12            | 6·3 (7,6)                                                                        | <b>21·6</b> (6,6)    | <b>17·0</b> (6,6)   | 4·6 (1,2 *)        | 13·5 (13,14*)         |
| 13            | 10·8 (25,7)                                                                      | <b>224·3</b> (6,10)  | 17·4 (5,7)          | 18·1 (6,7)         | <b>23·94</b> (17,24)  |
| 14            | -57·3 (9,5)                                                                      | 8·4 (6,9)            | 129·4 (6,6)         | 16 (5,4)           | 16·8 (17,19)          |
| 15            | 6·9 (2,4)                                                                        | 11·9 (6,10)          | 5·8 (6,9*)          | -                  | 9·62 (12,19*)         |
| 16            | 12·2 (27, 9)                                                                     | 7·1 (5,10)           | 3·5 (6,7)           | 1·75 (5,6*)        | 4·5 (16,23*)          |
| 17            | 14·0 (10,6)                                                                      | 12·1 (5,10)          | 22·4 (6,8)          | <b>128·0</b> (5,7) | 18·1 (16,25)          |
| 18            | 59·6 (24,8)                                                                      | 14·4 (5,10)          | 65·5 (7,8)          | 26·6 (6,7)         | 27·9 (18,25)          |
| 19            | 10·3 (52,13)                                                                     | 11·8 (5,11)          | 14 (6,7)            | 5·0 (5,5)          | 11·7 (16,23)          |
| 20            | 10·5 (9,7)                                                                       | 8·9 (6,10)           | 14·2 (6,6)          | 12·6 (6,4)         | 11·1 (18,20)          |
| 22            | 28·2 (30,5)                                                                      | <b>459·8</b> (6,10)  | <b>63·9</b> (5,7)   | 28·5 (6,7)         | <b>-169·2</b> (17,24) |
| 23            | 12·2 (51,8)                                                                      | <b>-476·2</b> (7,10) | <b>38·0</b> (5,8)   | <b>27·4</b> (5,7)  | <b>25·5</b> (17,25)   |
| 25            | 12·1 (11,5)                                                                      | <b>31·6</b> (6,10)   | 11·7 (6,6)          | 12·3 (6,3)         | 13·5 (18,19)          |
| 26            | 12·5 (52,9)                                                                      | 19·1 (6,10)          | 24·5 (6,8)          | 8·0 (6,7)          | 14·0 (18,25)          |
| 27            | 20·1 (56,7)                                                                      | <b>50·1</b> (5,9)    | <b>45·0</b> (4,5)   | 12·8 (11,4)        | 34·4 (20,18)          |
| 28            | -7·1 (10,6)                                                                      | 13·3 (5,10)          | 11·9 (6,6)          | 112·7 (6,4)        | 18·2 (17,20)          |
| 29            | 7·0 (14,6)                                                                       | 7·3 (6,10)           | <b>33·9</b> (6,8)   | 10·2 (6,8)         | 10·3 (18,26)          |
| 30            | 7·6 (9,7)                                                                        | 2·4 (4,8 *)          | -                   | -                  | 2·4 (4,8*)            |
| 31            | 14·7 (11,6)                                                                      | 9·7 (6,10)           | 14·0 (6,8)          | 18·8 (6,5)         | 10·1 (18,23)          |
| 32            | -365·6 (2,4)                                                                     | 16·5 (6,10)          | 18·1 (6,7)          | -1·51 (5,3)        | 20·2 (17,20)          |
| <b>Median</b> | 11·98                                                                            | 12·15                | 17·26               | 17·56              | 16·82                 |
| <b>Range</b>  | -356·6 to 67·9                                                                   | -476·2 to 459·8      | -117·4 to 129·4     | -1·5 to 227·4      | -169·2 to 62·6        |

PSA-DTs were calculated for each patient pre-treatment, for 6 monthly periods on study and for the whole study follow-up period (week 0-72). PSA values pre-treatment were evaluated by a blinded expert and only evaluable PSA's were used. The number of months and the number of values used to calculate the DT are in parentheses. Bolded PSA-DT indicates a >200% increase over pre-treatment. \*Denotes patients received treatment and further PSA values were not included in PST-DT calculation.
